# Supplementary material
Source: Springer Nature journal article supplement (https://www.springerprofessional.de/resource/supplementary/40493_2013_6_MOESM1_ESM.pdf/11899620)

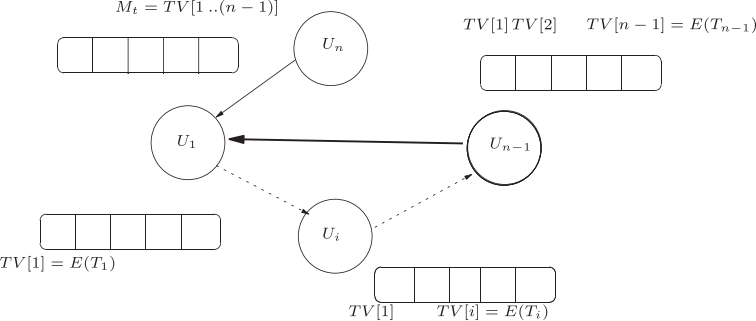

Round 1

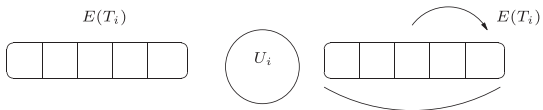

Round 2

Supplement: MOESM1 [file 11899620]
